# Supplementary material for: Target-enriched nanopore sequencing and de novo assembly reveals co-occurrences of complex on-target genomic rearrangements induced by CRISPR-Cas9 in human cells
Source: HighWire-hosted journal article supplement (doi:10.1101/gr.276901.122), 2022-09-30
Supplement: supplemental_files.zip [file CLUSTAL W HAP1_t72_HepG2_t15_ref.docx]

CLUSTAL W (1.83) multiple sequence alignment

HAP1_t72 CCAGGACCACATTTTGAGAGCCACTGCTGTTGAATCCCCAGTTCCTTTCA

HepG2_t15 CCAGGACCACATTTTGAGAGCCACTGCTGTTGAATCCCCAGTTCCTTTCA

reference CCAGGACCACATTTTGAGAGCCACTGCTGTTGAATCCCCAGTTCCTTTCA

**************************************************

HAP1_t72 GTCCCTCACTGCTCCTCGTCTGCCAGTAGGAGTAAAAGCAAACAGCTTAG

HepG2_t15 GTCCCTCACTGCTCCTCGTCTGCCAGTAGGAGTAAAAGCAAACAGCTTAG

reference GTCCCTCACTGCTCCTCGTCTGCCAGTAGGAGTAAAAGCAAACAGCTTAG

**************************************************

HAP1_t72 GAAAAATCGAC---------------------------------------

HepG2_t15 GAAAAATCGACA--------------------------------------

reference GAAAAATCGACACCCAGGACAAAAACAGTATCTCGAAAAGGCCAAAGAGG

**********

HAP1_t72 --------------------------------------------------

HepG2_t15 --------------------------------------------------

reference GGGCACCCGGATTTGAACCGGGGACCTCTTGATCTGCAGTCAAATGCTCT

HAP1_t72 --------------------------------------------------

HepG2_t15 --------------------------------------------------

reference ACCACTGAGCTATACCCCCTCTGCCGGCAAACCGACCGCACGTAGTCGTT

HAP1_t72 --------------------------------------------------

HepG2_t15 --------------------------------------------------

reference TAGTGGTATTGCTGCGCAGGCGCTGTGTGGCGTTCCCGAAGGGAAGTGGA

HAP1_t72 --------------------------------------------------

HepG2_t15 --------------------------------------------------

reference AGTGGGGTAAGACGTTTACAAGAGATGGAAAAAATACAACTCCCAGAAGA

HAP1_t72 --------------------------------------------------

HepG2_t15 --------------------------------------------------

reference ATTACTCACTTGGAAGCAGGGGTTGTTCCCTGAAGCTCTGAGCTGAAGAT

HAP1_t72 --------------------------------------------------

HepG2_t15 --------------------------------------------------

reference CCCCACTGGCAGTATAAGAAAATATATTCCTGGGGTGTGGAAGGAGAAGT

HAP1_t72 --------------------------------------------------

HepG2_t15 --------------------------------------------------

reference CTCTCGAAATATTTCACTTCGGGGGCGTCCCACTCTCCTGCCCTGCAGAA

HAP1_t72 --------------------------------------------------

HepG2_t15 --------------------------------------------------

reference GACCCCTTGCCACGTCTCGGAGCTTCTTTCTCCCTCCCACATGCTCACGC

HAP1_t72 --------------------------------------------------

HepG2_t15 --------------------------------------------------

reference GGCTTCTCCCGACCTGTCTTCCCCAGCCCAGCCCTTAGAAACTCAGCCTC

HAP1_t72 --------------------------------------------------

HepG2_t15 --------------------------------------------------

reference CTTCCCGCCAAGAAAGAGCCAGGCTGACCTGGGGGTGCGCTCGCCTCCGC

HAP1_t72 --------------------------------------------------

HepG2_t15 --------------------------------------------------

reference CCTGCCATTGCGAGGTTGAGCCACCCGTACCGTGTTCCAAGGGTCAGCCC

HAP1_t72 --------------------------------------------------

HepG2_t15 --------------------------------------------------

reference GGAGCTCCTCGCCCTCACTCGCATTGCATTCTACCCTGGGTACACACACA

HAP1_t72 --------------------------------------------------

HepG2_t15 --------------------------------------------------

reference GGCTGAGCCACTGGCAGGGGCCAGGACTCCATCCTCACTCGCCTGCGAAA

HAP1_t72 --------------------------------------------------

HepG2_t15 --------------------------------------------------

reference GCAAAAAGGGTGGCAGGGCTCGAGACTCCCTCCCATTCCATCTGTGCGGG

HAP1_t72 --------------------------------------------------

HepG2_t15 --------------------------------------------------

reference AACTCTTTAGAGGACCTCCGGAGACCAACAAAACGAGGTAACTCCGGAGC

HAP1_t72 --------------------------------------------------

HepG2_t15 --------------------------------------------------

reference ACAGAGGGGGCACCCGGATTTGAACCGGGGACCTCTTGATCTGCAGTCAA

HAP1_t72 ----------------------------------ACTACGTTGTCATTAG

HepG2_t15 ---------------------------------CACTACGTTGTCATTAG

reference ATGCTCTACCACTGAGCTATACCCCCGCCACGCCACTACGTTGTCATTAG

****************

HAP1_t72 AGTTAATTTCTATGGAATAGGGGTGTGGTCTTCATTTTCCCTTAAAGTTT

HepG2_t15 AGTTAATTTCTATGGAATAGGGGTGTGGTCTTCATTTTCCCTTAAAGTTT

reference AGTTAATTTCTATGGAATAGGGGTGTGGTCTTCATTTTCCCTTAAAGTTT

**************************************************

HAP1_t72 TAATCTGAGGGTTGCGTCGGGATACCTACTGAAAAAAACACAAAATACAA

HepG2_t15 TAATCTGAGGGTTGCGTCGGGATACCTACTGAAAAAAACACAAAATACAA

reference TAATCTGAGGGTTGCGTCGGGATACCTACTGAAAAAAACACAAAATACAA

**************************************************

HAP1_t72 TGGGAATGGCTAGAACTCCTGAGTTCTTCCTTCA

HepG2_t15 TGGGAATGGCTAGAACTCCTGAGTTCTTCCTTCA

reference TGGGAATGGCTAGAACTCCTGAGTTCTTCCTTCA

**********************************

NOTE:

Targeted tRNA genes highlighted in red

gRNA-Δt-1 highlighted in yellow

gRNA-Δt-2 highlighted in green
