# Supplementary material for: Target-enriched nanopore sequencing and de novo assembly reveals co-occurrences of complex on-target genomic rearrangements induced by CRISPR-Cas9 in human cells
Source: HighWire-hosted journal article supplement (doi:10.1101/gr.276901.122), 2022-09-30
Supplement: Supplemental_Table_S1.xlsx [file Supplemental_Table_S1.xlsx]

## Sheet: Sheet1
#Table S1. Sequences of the primers and probes used.
	forward primer	reverse primer
Oligo sequence for cloning the gRNAs
gRNA-Δt-1 *	CACCGCTTAGGAAAAATCGACACCC	AAACGGGTGTCGATTTTTCCTAAGC
gRNA-Δt-2 *	CACCGCTAATGACAACGTAGTGGCG	AAACCGCCACTACGTTGTCATTAGC
gRNA-Δi-1 *	CACCGACTAAACGACTACGTGCGGT	AAACACCGCACGTAGTCGTTTAGTC
gRNA-Δi-2 *	CACCGCTCGTTTTGTTGGTCTCCGG	AAACCCGGAGACCAACAAAACGAGC
* gRNA target sequences are in blue
Primers for Xdrop enrichment
Xdrop: HAP1 Δt72; HepG2 Δt15	CCCTCACTCGCATTGCATTC	AAGAGTTCCCGCACAGATGG
Xdrop: HepG2 Δt8, HepG2 Δi50	GTGGAAGTGGGGTAAGACGT	CCAGTGGGGATCTTCAGCTC
PCR primers for contig validation
HAP1 Δt72 contig validation set #1	CATTAGGTCTGGGATGAGG	AAAGCGTGGCTATGAAGG
HAP1 Δt72 contig validation set #2	CATTAGGTCTGGGATGAGG	CTCACTTGGAAGCAGGGGTT
HAP1 Δt72 contig validation set #3	CTCACTTGGAAGCAGGGGTT	GACGCCCCCGAAGTGAAATA
HAP1 Δt72 contig validation set #4	AAAGCGTGGCTATGAAGG	GACGCCCCCGAAGTGAAATA
HepG2 Δt15 contig validation set #1	TTCAGTCCCTCACTGCTCCT	TCCTTCCCGCCAAGAAAGAG
HepG2 Δt15 contig validation set #2	TTCAGTCCCTCACTGCTCCT	GACCCTTGGAACACGGTACG
HepG2 Δt15 contig validation set #3	TCCTTCCCGCCAAGAAAGAG	CGACGACAGCCTGACCTTTA
PCR primer for characterizing CRISPR-Cas9 clones
deletion validation in Δt and Δi	CATTAGGTCTGGGATGAGG	AAAGCGTGGCTATGAAGG
detecting target region in Δt and Δi	CTCACTTGGAAGCAGGGGTT	GACCCTTGGAACACGGTACG
detecing alterations at 3'DSB in Fig. S5C	TCCTTCCCGCCAAGAAAGAG	TTTGGGGGAGAGTCTAGGCA
deletion validation in ΔR	CTTTGGTGTACCTGTCTCAGTT	ACTTACATCTGTCATTCCGATC
detecting target region in ΔR	TTTGCCAATCGTGATTTCCCCC	CGGAAAGCCCCCACACCACTAT
deletion validation in ΔS	TCTCCAGAACAACTGTCAATCT	AGTAGTACCTGTGACAAAAGGC
detecting target region in ΔS	CACTTATCCTAAATCAGGTGAG	GGAAACACTACCATCTTAACAC
PCR/qPCR primer for CRISPR-Cas9 vector detection
puromycin resistant gene (PuroR gene)	TGCAAGAACTCTTCCTCACG	CCGGGAACCGCTCAACTC
Cas9 gene	GCAGCTGCCTGAGAAGTACA	TGTTCAGCTTCACGAGCAGT
gRNA-scaffold	ATCGACACCCGTTTTAGAGC	CGACTCGGTGCCACTTTTTC
Probes/primer for TaqMan assay
	TaqMan probe	forward primer	reverse rpimer
Target region	CTCCCGACCTGTCTTC	CTTTCTCCCTCCCACATGCT	GGAAGGAGGCTGAGTTTCTAAGG
5'-flainking region	CCCGGCGTCTTTGCACA	AGTCTCGGGACGGATTCCA	GAGGTACCCCAGATGGAGGAA
